# Supplementary material
Source: publisher site journal article supplement (https://www.spandidos-publications.com/8431/downloadSupplementary)
Supplement: Supplementary file 1 [file downloadSupplementary]

**Table SI.** Primer and probe sequences for qMSP.

| Gene | Sequences before bisulfite conversion (5'-3') | Sequences after bisulfite conversion (5'-3') |
|------|-----------------------------------------------|----------------------------------------------|
| NID2 | F: CGGTTTCCAGTCCTGCGGAGCAG                    | F: CGGTTTTTTAGTTTTGCGGAGTAG                  |
| NID2 | P: FAM-TACCGCCTCCGTGGCCGCG-MGB                | P: FAM-TATCGTTTTTCGTGGTCGCG-MGB              |
| NID2 | R: CTTGCCCATTGCTGCGGCCGTCG                    | R: CTTACCCATTACTACGACCGTCG                   |
| CDO1 | F: GTCCCAGCGTCGCGAACCACAGC                    | F: GTTTTAGCGTCGCGAATTATAGC                   |
| CDO1 | P: VIC-AGAGGCGTTAGGCCGG-MGB                   | P: VIC-AGAGGCGTTAGGTCGG-MGB                  |
| CDO1 | R: TCTCCCCCACTTTAACGGCG                       | R: TCTCCCCCACTTTAACGACG                      |
| ACTB | F: CCCCTGGCGGCCTAAGGACTC                      | F: TTTTTGGCGGTTTAAGGATTC                     |
| ACTB | P: CY5-CGCCGGAAGTGGCCAGG-MGB                  | P: CY5-CGTCGGAAGTGGTTAGG-MGB                 |
| ACTB | R: CGCGCTGTGAGCCGAGGTCG                       | R: CGCGCTATAAACCGAAATCG                      |

F, forward; R, reverse; P, probe; NID2, nidogen-2; CDO1, cysteine dioxygenase 1; ACTB,  $\beta$ -actin.

**Table SII.** Characteristics of participants after propensity score matching.

| Characteristics             | NC (n=57)        | OC (n=57)        | P-value |
|-----------------------------|------------------|------------------|---------|
| Age, years [median (range)] | 62 (50.50-69.50) | 60 (54.00-68.00) | 0.912   |
| ECOG PS score               |                  |                  | 0.751   |
| 0-2                         | 52 (91.2)        | 51 (89.5)        |         |
| 3-4                         | 5 (8.8)          | 6 (10.5)         |         |
| Hypertension                | 15 (26.3)        | 20 (35.1)        | 0.310   |
| Type 2 diabetes mellitus    | 13 (22.8)        | 13 (22.8)        | 1.000   |

After 1:1 nearest neighbor matching without replacement, 57 patients in the OC group were successfully matched to 57 participants in the NC group. Post-matching analysis revealed no significant differences in baseline characteristics between the two groups (all  $P>0.05$ ), indicating that the potential confounding effects of hypertension and performance status were effectively balanced. Values are expressed as n (%) unless otherwise specified. ECOG PS, Eastern Cooperative Oncology Group performance status; NC, normal control; OC, ovarian cancer.

**Table SIII.** Diagnostic values of serum makers for patients with International Federation of Gynecology and Obstetrics stage I-II ovarian cancer.

| <b>Marker</b> | <b>Sn, %</b> | <b>Sp, %</b> | <b>Youden index</b> | <b>AUC</b> | <b>P-value</b> | <b>95% CI</b> |
|---------------|--------------|--------------|---------------------|------------|----------------|---------------|
| NID2          | 38.5         | 96.0         | 0.345               | 0.560      | 0.491          | 0.337-0.783   |
| CDO1          | 84.6         | 89.3         | 0.739               | 0.916      | <0.001         | 0.846-0.987   |
| CA125         | 76.9         | 97.3         | 0.742               | 0.893      | <0.001         | 0.766-1.000   |

CA125, carbohydrate antigen 125; NID2, nidogen-2; CDO1, cysteine dioxygenase 1; Sn, sensitivity; Sp, specificity; AUC, area under the curve.

**Table SVI.** Diagnostic values of serum makers for patients with International Federation of Gynecology and Obstetrics stage III-IV ovarian cancer.

| <b>Marker</b> | <b>Sn, %</b> | <b>Sp, %</b> | <b>Youden index</b> | <b>AUC</b> | <b>P-value</b> | <b>95% CI</b> |
|---------------|--------------|--------------|---------------------|------------|----------------|---------------|
| NID2          | 78.0         | 96.0         | 0.740               | 0.810      | <0.001         | 0.720-0.900   |
| CDO1          | 91.5         | 69.3         | 0.608               | 0.870      | <0.001         | 0.811-0.929   |
| CA125         | 76.3         | 93.3         | 0.696               | 0.878      | <0.001         | 0.815-0.942   |

CA125, carbohydrate antigen 125; NID2, nidogen-2; CDO1, cysteine dioxygenase 1; Sn, sensitivity; Sp, specificity; AUC, area under the curve.
